# Supplementary material
Source: Research Square preprint supplement (doi:10.21203/rs.3.rs-9542115/v1)
Supplement: Supplementary file 2 [file 21e249eaae2768ca763ee182.pdf]

|                                                                                 |       | $\Delta\text{LVOT VTI}$<br>$\geq 12\%$ |    |       |
|---------------------------------------------------------------------------------|-------|----------------------------------------|----|-------|
|                                                                                 |       | -                                      | +  | total |
| $\Delta\text{RVOT}_{\text{SC}} \text{VTI} >$<br><b>12.01%</b><br>(Youden index) | -     | 36                                     | 1  | 37    |
|                                                                                 | +     | 1                                      | 12 | 13    |
|                                                                                 | total | 37                                     | 13 | 50    |
