# Supplementary material
Source: Research Square preprint supplement (doi:10.21203/rs.3.rs-9542115/v1)
Supplement: Supplementary file 3 [file 88c5669d9c7b9b2e5b1d8960.pdf]

| <b>Patient data (n=41)</b>                                                   |                  |
|------------------------------------------------------------------------------|------------------|
| Age (years), median (IQR)                                                    | 62 (50–69)       |
| Sex ratio (Male/Female)                                                      | 2.4              |
| BMI (kg/m <sup>2</sup> ), median (IQR)                                       | 23.7 (20.8–26.5) |
| <b>Medical history</b>                                                       |                  |
| Hypertension, n (%)                                                          | 21 (51.2%)       |
| Chronic obstructive pulmonary disease, n (%)                                 | 5 (12.2%)        |
| Chronic kidney disease, n (%)                                                | 9 (22.0%)        |
| Cancer, n (%)                                                                | 5 (12.2%)        |
| Diabetes mellitus, n (%)                                                     | 12 (29.3%)       |
| Cirrhosis, n (%)                                                             | 1 (2.4%)         |
| Immunosuppression, n (%)                                                     | 6 (14.6%)        |
| SAPS II, mean ± SD                                                           | 46 ± 20          |
| <b>Clinical status data at complete echocardiographic examination (n=50)</b> |                  |
| <b>Macrohaemodynamic parameters</b>                                          |                  |
| Mean arterial pressure (mmHg), mean ± SD                                     | 87 ± 17          |
| Pulse pressure (mmHg), mean ± SD                                             | 53 ± 20          |
| Heart rate (bpm), median (IQR)                                               | 89 (76–108)      |
| <b>Acute circulatory failure, n %</b>                                        |                  |
| Septic, n %                                                                  | 11 (50.0%)       |
| Cardiogenic, n %                                                             | 5 (22.7%)        |
| Vasoplegic, n %                                                              | 4 (18.2%)        |
| Obstructive, n %                                                             | 0 (0.0%)         |
| Mixed, n %                                                                   | 2 (9.1%)         |
| <b>Vasopressor/inotropic support, n %</b>                                    |                  |
| Norepinephrine, n %                                                          | 20 (90.9%)       |
| Median dose (µg/kg/min) (IQR)                                                | 0.32 (0.15–0.74) |
| Arginine vasopressin, n %                                                    | 6 (27.3%)        |
| Median dose (µg/kg/min) (IQR)                                                | 0.03 (0.03–0.03) |
| Dobutamine, n %                                                              | 7 (31.8%)        |
| Median dose (µg/kg/min) (IQR)                                                | 5.0 (2.5–5)      |
| Atrial fibrillation, n %                                                     | 6 (12.0%)        |
| <b>Ventilatory/oxygen support</b>                                            |                  |
| Invasive mechanical ventilation, n %                                         | 25 (64.1%)       |
| High-flow nasal oxygen, n %                                                  | 8 (20.5%)        |
| NIV, n %                                                                     | 0 (0.0%)         |
| Conventional oxygen therapy, n %                                             | 6 (15.4%)        |
| ARDS, n %                                                                    | 11 (26.8%)       |
| PEEP if intubated or NIV (cmH <sub>2</sub> O), median (IQR)                  | 7 (5–8)          |
| Sedation, n %                                                                | 17 (41.5%)       |
| Continuous renal replacement therapy, n %                                    | 5 (12.2%)        |
