# Supplementary material
Source: Research Square preprint supplement (doi:10.21203/rs.3.rs-9542115/v1)
Supplement: Supplementary file 6 [file c9427267a09b14f5514275b6.pdf]

|                                                          |       | $\Delta\text{LVOT VTI}$<br>$\geq 12\%$ |    |       |
|----------------------------------------------------------|-------|----------------------------------------|----|-------|
|                                                          |       | -                                      | +  | total |
| $\Delta\text{RVOT}_{\text{sc}} \text{VTI}$<br>$> 15.9\%$ | -     | 36                                     | 7  | 43    |
|                                                          | +     | 1                                      | 6  | 7     |
|                                                          | total | 37                                     | 13 | 50    |
