# Supplementary material
Source: Research Square preprint supplement (doi:10.21203/rs.3.rs-9542115/v1)
Supplement: Supplementary file 7 [file f6054d3b4c30e0ccc1382bc1.pdf]

|                                                              |              | $\Delta\text{LVOT VTI}$<br>$\geq 12\%$ |    |              |
|--------------------------------------------------------------|--------------|----------------------------------------|----|--------------|
|                                                              |              | -                                      | +  | <b>total</b> |
| $\Delta\text{RVOT}_{\text{sc}} \text{VTI}$<br>$\geq 13.04\%$ | -            | 36                                     | 1  | 37           |
|                                                              | +            | 1                                      | 12 | 13           |
|                                                              | <b>total</b> | 37                                     | 13 | 50           |
