# Supplementary material
Source: Research Square preprint supplement (doi:10.21203/rs.3.rs-9542115/v1)
Supplement: Supplementary file 8 [file fa4ed5a46dc56849421b8fa1.pdf]

|                            | <b>t0</b> | <b>t1<sub>PLR</sub></b> | <b>t2</b> | <b>overall</b> |
|----------------------------|-----------|-------------------------|-----------|----------------|
| CO <sub>SC</sub> (%)       | 23.6      | 23.6                    | 23.6      | 25.0           |
| CO <sub>STD</sub> (%)      | 12.5      | 15.3                    | 13.9      | 15.3           |
| RVOT <sub>SC</sub> VTI (%) | 23.6      | 23.6                    | 22.2      | 26.4           |
| LVOT VTI (%)               | 11.1      | 15.3                    | 13.9      | 15.3           |
| RVOT <sub>SCd</sub> (%)    | 25.0      | //                      | //        | //             |
| LVOT <sub>SCd</sub> (%)    | 8.3       | //                      | //        | //             |
