# Supplementary material
Source: Research Square preprint supplement (doi:10.21203/rs.3.rs-9542115/v1)
Supplement: Supplementary file 9 [file fa805a84c75be15ac07accda.pdf]

|              | <b>t0</b> | <b>t1<sub>PLR</sub></b> | <b>t2</b> | <b>Global</b> |
|--------------|-----------|-------------------------|-----------|---------------|
| SC (%)       | 84.7      | 83.3                    | 84.7      | 79.2          |
| A5C+PLAX (%) | 87.5      | 84.7                    | 86.1      | 84.7          |
