# Supplementary material
Source: Research Square preprint supplement (doi:10.21203/rs.3.rs-9542115/v1)

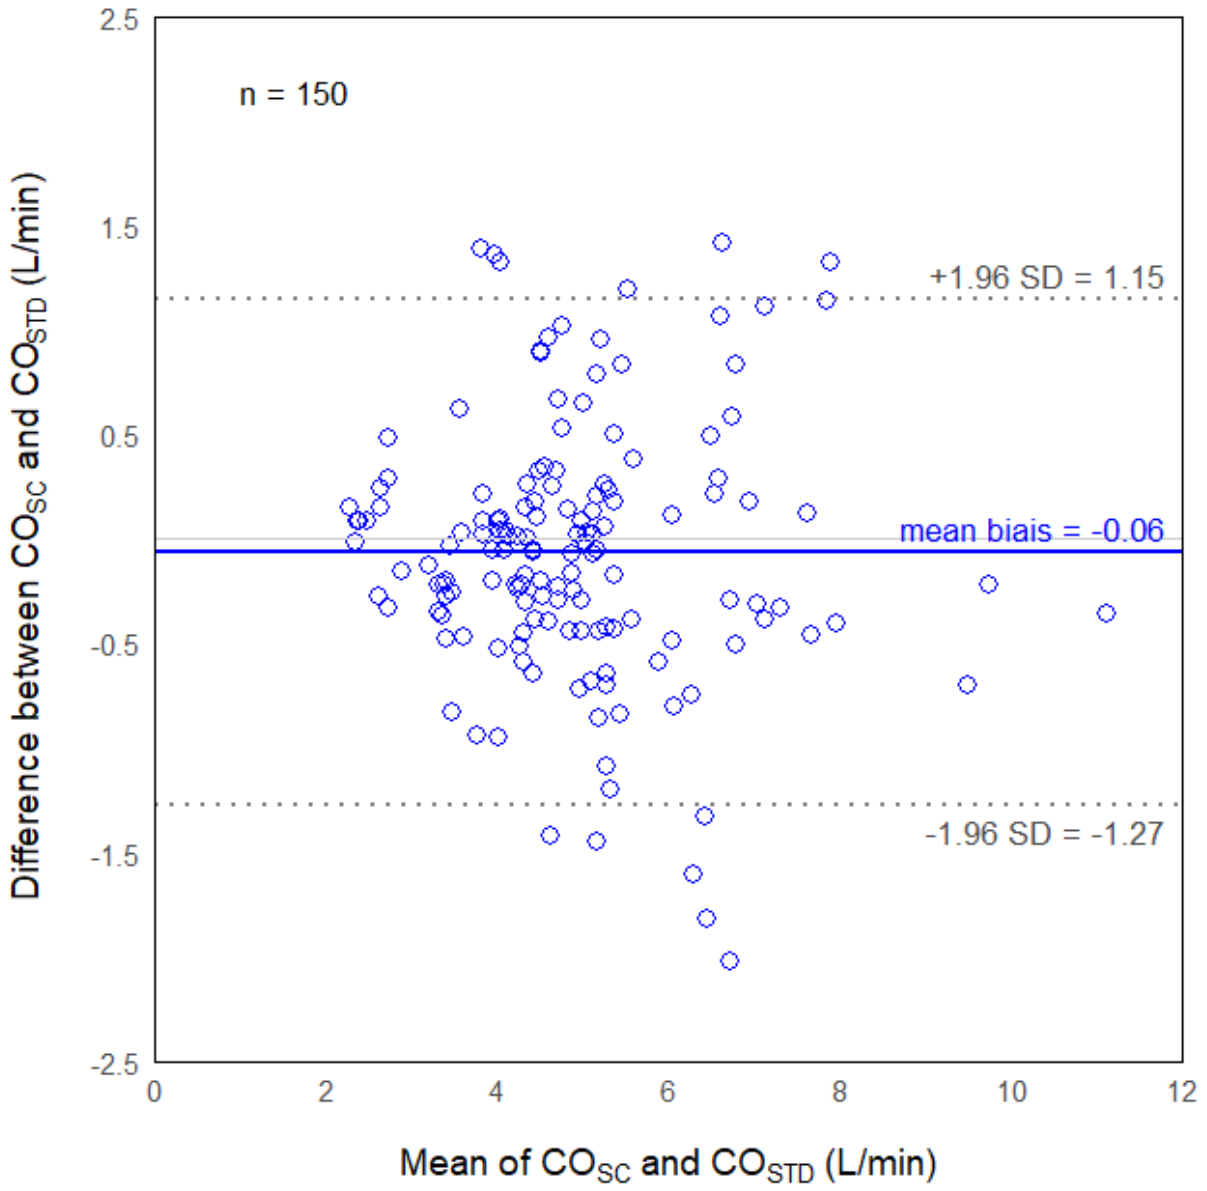

Supplement: Supplementary file 1 [file 02d10e25d8de976cb8bd8f75.pdf]

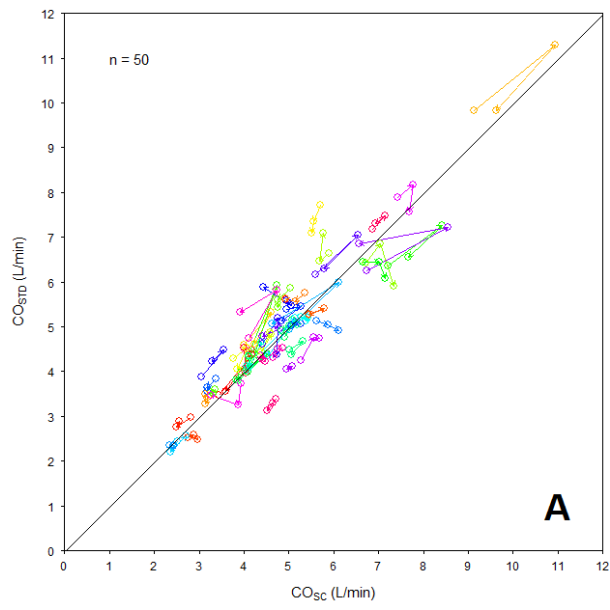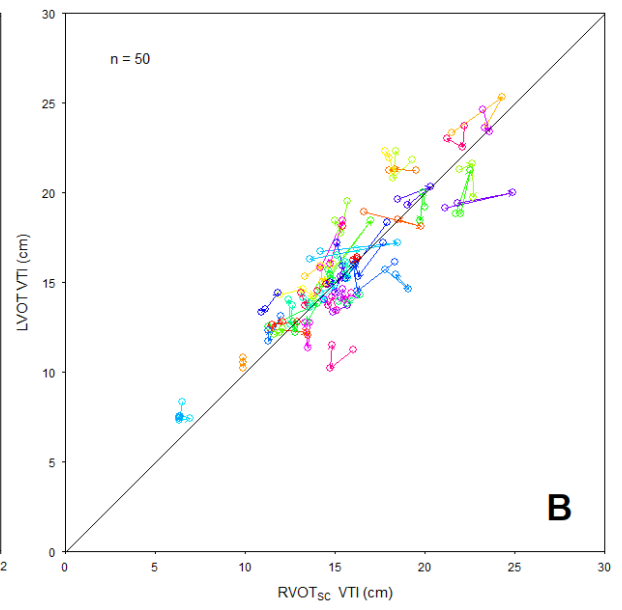

Supplement: Supplementary file 4 [file 9da81de6b2b1660aac545015.pdf]

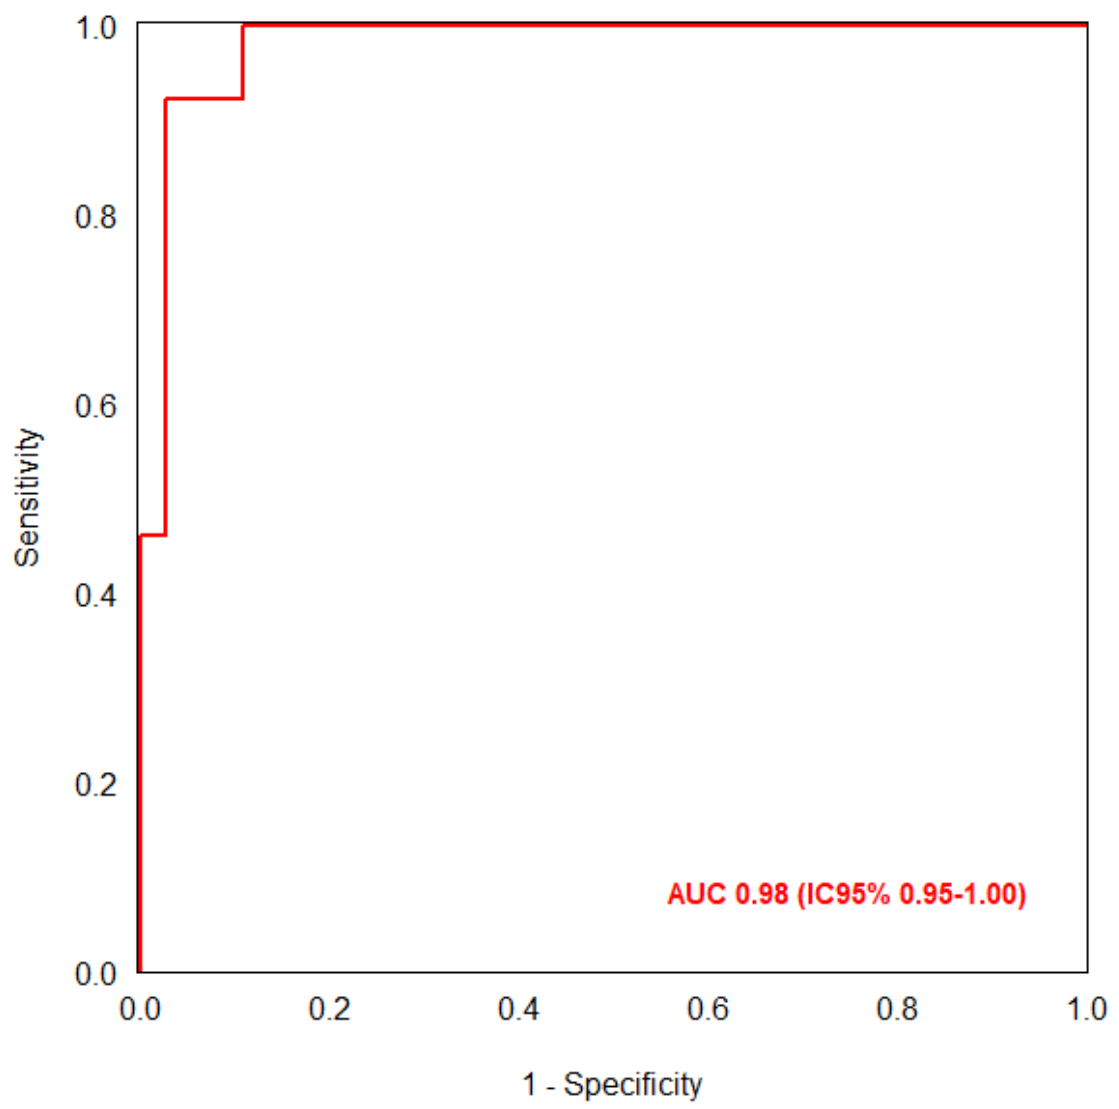

Supplement: Supplementary file 5 [file c460c745f316b1d5b1639707.pdf]
